# Supplementary material for: Effect of Non-Deceptive Placebo on Weight Loss: A Preliminary Study
Source: Research Square preprint supplement (doi:10.21203/rs.3.rs-410966/v1), 2021-04-14
Supplement: Supplementary file 1 [file abb0a3b467e87772ae42a4bc.pdf]

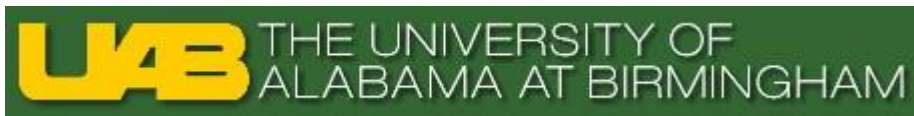

April 6, 2021

Dr. Lorenzo Donini  
Editors-in-Chief  
*Eating and Weight Disorders: Studies on Anorexia, Bulimia, and Obesity*

Dear Dr. Donini,

We are submitting a Brief Report titled “**Effect of Non-Deceptive Placebo on Weight Loss: A Preliminary Study**” for publication consideration in *Eating and Weight Disorders*.

This is the first study on the effect of open-label placebo (non-deceptive placebo) in obesity. Specifically, we tested if adults on OLP pills had a greater amount weight loss and lower food craving than a control group not on the pills while all underwent a simple weight-loss intervention.

We are submitting the study as a **Brief Report** because, as stated in the Author Guidelines, it is a preliminary study and a new approach to treating obesity. We also obtained negative results but provide evidence against a Type II error, acknowledge the limitation of a small sample size, and make novel suggestions for how OLP might be modified to benefit obesity in future studies. While preliminary, the study was longitudinal, controlled, well-designed, and employed a diverse sex and ethnic sample with a mean BMI of 35. As such, we believe the paper makes an important contribution to obesity treatment research and will capture the interest of researchers and clinicians alike.

We exceed the 10 reference limit by two for a Brief Report format. If you wish us to bring it down we will be more than happy to do so.

We hope that you find the paper worthy of peer review and eventual publication in *Eating and Weight Disorders*. We have listed potential referees from various countries on the following page to aid in the process. Thank you for your attention to our work and we look forward to hearing from you.

Sincerely yours,

A handwritten signature in black ink, appearing to read 'M. Boggiano', written over a horizontal line.

Mary M. Boggiano, Ph.D. (for all authors)  
Associate Professor  
Department of Psychology  
The University of Alabama at Birmingham  
[boggiano@uab.edu](mailto:boggiano@uab.edu)  
205-934-3850

## Suggested Referees

Kari A. Leibowitz [kleibow@stanford.edu](mailto:kleibow@stanford.edu) or Alia J. Crum [crum@standford.edu](mailto:crum@standford.edu)

Wen-Bin Chiou [Wbchiou@mail.nsysu.edu.tw](mailto:Wbchiou@mail.nsysu.edu.tw)

Michael Schaefer [michael.schaefer@medicalschooll-berlin.de](mailto:michael.schaefer@medicalschooll-berlin.de)

John M. Kelley [JKelley@Post.Harvard.Edu](mailto:JKelley@Post.Harvard.Edu)

Uri Nitzan [urini@clalit.org.il](mailto:urini@clalit.org.il)
